# Supplementary material for: Photon Hunting in the Twilight Zone: Visual Features of Mesopelagic Bioluminescent Sharks
Source: PLoS One. 2014 Aug 6;9(8):e104213. doi: 10.1371/journal.pone.0104213 (PMC4123902; doi:10.1371/journal.pone.0104213)
Supplement: Dataset S1 — Supplementary dataset file containing shark photoreception data compiled from the literature and the present paper. These data were used in comparative analyses of shark visual system whose results are presented in Figure 6. (XLSX) [file pone.0104213.s001.xlsx]

## Sheet: Feuil1
Supplementary Data 1. Data matrix of shark visual data
Species	Group	Mass (kg); Eye size (mm)	Mass-specific eye size*	ROS diameter (μm)	ROS length (μm)	Sensitivity S (mm2 sr)	Nyquist frequency PR (cycles s-1)	λmax (nm)	Nyquist frequency GC (cycles s-1)	Mass (kg); SRP (cycles deg-1)	Mass-specific SRP *
Alopias superciliosus	Deep	62.73; 62.1 [68]	0.331145						14.52 [58]	62.73 [68]; 10.56 [58]	0.180342
Apristurus brunneus	Deep							483 [6]
Apristurus platyrynchus	Deep			5.41 [21]	48.02 [21]	9.23	134.02 [21]
Asymbolus analis	Shallow	0.32; 13.3 [68]	0.0233711
Asymbolus rubiginosus	Shallow	0.26; 13 [68]	0.0276823
Carcharhinus amblyrhynchos	Shallow	20.6; 26.2 [68]	0.0326127						33.9 [58]
Carcharhinus amboinensis	Shallow							507.4 [69]
Carcharhinus cautus	Shallow							505.5 [69]
Carcharhinus falciformis	Shallow	97.96; 35.2 [68]	0.0540725	2.3 [92]	22.5 [92]	1.13
Carcharhinus leucas	Shallow	72.85; 20.5 [68]	-0.160435	2.1 [25]	24.6 [25]	1		518.4 [69]	27.4 [58]
Carcharhinus limbatus	Shallow							505.6 [66]
Carcharhinus longimanus	Deep			1.8 [92]	17.3 [92]	0.58
Carcharhinus melanopterus	Shallow	7.65; 20.5 [68]	-0.00609765					505.4 [69]	24.03 [15],[58]	7.65 [68]; 3.77 [15],[58]	-0.137883
Carcharhinus obscurus	Deep							502.4 [69]
Carcharhinus plumbeus	Shallow	16.4; 21.2 [68]	-0.0437382	2 [92]	20 [92]	0.79	164.92 [71]		23.81 [71]	105.58 [68]; 8.9 [71]	0.0741254
Carcharhinus sorrah	Shallow							504.9 [69]
Carcharias taurus	Shallow	152.3; 18.3 [68]	-0.26024						21.36 [58]	152.3; 4.87 [58]	-0.210215
Carcharodon carcharias	Deep	727.27; 37.1 [68]	-0.0603845	3.4 [92]	22.1 [92]	2.45
Centrophorus squamosus	Deep							482 [96]
Centroscymnus coelolepis	Deep	2.38; 25.5 [90]	0.168648	1.85 [90]	32.8 [90]	0.99		472 [96]	30.47 [90]	2.38 [65]; 7.47 [90]	0.263748
Chiloscyllium punctatum	Shallow	0.7; 11.9 [68]	-0.0785384	2.6 [93]	45.2 [93]	2.08		499.6 [69]	28.46 [58]
Daenia calcea	Deep							484 [96]
Daenia quadrispinosum	Deep						143.28 [21]
Etmopterus granulosus	Bioluminescent							483 [Garza-Gisholt, Hart & Collin, unpublished]
Etmopterus lucifer	Bioluminescent	0.048; 8.29 [this study]	-0.0520078	2.47 [this study]	51.47 [this study]	1.97	206.14 [this study]		27.04 [this study]	0.048; 2.53 [this study]	0.033081
Etmopterus pusillus	Bioluminescent	0.99; 19.3 [this study]	0.107734
Etmopterus sheikoi	Bioluminescent	0.15; 13.22 [Claes, unpublished]	0.0726386
Etmopterus spinax	Bioluminescent	0.408; 15.5 [this study]	0.0732137	3.58 [this study]	51.18 [this study]	4.13	199.59 [this study]	487.5 [this study]	18.2 [this study]	0.491; 3.75 [this study]	0.0282863
Etmopterus splendidus	Bioluminescent	0.048; 9 [this study]	-0.0163198	2.16 [this study]	69.35 [this study]	1.63	225.40 [this study]	484.6 [this study]	25.23 [this study]	0.029; 2.17 [this study]	-0.0357052
Figaro boardmani	Deep	0.2; 13.3 [68]	0.0555578
Galeocerdo cuvier	Shallow	148.6; 29.5 [68]	-0.0511845					499.3 [69]	23.6 [59]
Galeus melastomus	Deep	0.15; 14.4 [68]	0.10977	2.16 [70]	77.1 [70]	1.67		481.5 [70]	26.94 [59]	0.174; 4.09 [59]	0.129626
Hemigaleus microstoma	Shallow	2.33; 14.8 [68]	-0.066176
Hemiscyllium ocellatum	Shallow	0.65; 10.6 [68]	-0.123704	3.2 [25]	29.5 [25]	2.58	157.65 [22]	499.5 [69]	26.16 [22]	1.324; 2.8 [22]	-0.159448
Heterodontus portusjacksoni	Shallow			3 [25]	31.3 [25]	2.34		496.3 [69]
Isistius brasiliensis	Bioluminescent	0.62; 12.4 [68]	-0.0523527						21.17 [59]	0.409; 2.61 [59]	-0.0842847
Isurus oxyrinchus	Deep	232; 35.2 [68]	-0.00497106	3.5 [92]	20.2 [92]	2.45
Mustelus californicus	Deep							499 [97]
Mustelus henlei	Shallow							496 [98]
Negaprion acutidens	Shallow							513.5 [69]
Negaprion brevirostris	Shallow			2.3 [94]	16 [94]	0.9		501 [99]	21.49 [102]
Orectolobus hutchinsi	Shallow			3.23 [95]	22.14 [95]	2.21		495.6 [69]	22.99 [95]
Orectolobus maculatus	Shallow			3.16 [95]	13.09 [95]	1.45		484.4 [69]	30.81 [95]
Orectolobus ornatus	Shallow	3.24; 13.7 [68]	-0.122296	2 [22]	23.4 [22]	0.88	121.34 [22]	498.4 [69]	21.63 [22]
Orectolobus parvimaculatus	Shallow			4.45 [95]	34.56 [95]	5.42		493.8 [69]	33.61 [95]
Oxynotus bruniensis	Deep			3.76 [21]	36.43 [21]	3.97	151.97 [21]
Parmaturus bigus	Deep						142.15 [21]
Parmaturus macmillani	Deep						117.44 [21]
Prionace glauca	Shallow	56.23; 36.9 [68]	0.112571	2.3 [92]	29.2 [92]	1.33			20.13 [58]
Pristiophorus delicatus	Deep	0.7; 12 [68]	-0.0749041
Pseudocarcharias kamoharai	Deep	3.9; 27.7 [68]	0.170766
Rhizoprionodon taylori	Shallow							508.2 [69]
Scyliorhinus torazame	Shallow	0.522; 9.6 [91]	-0.151721	1.91 [91]	17.41 [91]	0.66			23.74 [91]	0.522; 2.91 [91]	-0.0856083
Scyliothinus canicula	Shallow	0.37; 11.6 [68]	-0.0459649	1.38 [70]	53.4 [70]	0.62		495.7 [70]	26.3 [59]	0.327; 3.98 [59]	0.0790776
Sphyrna lewini	Deep	25; 25.5 [68]	0.00759451						22.09 [58]	25; 6.89 [58]	0.051341
Sphyrna mokkaran	Shallow	148.5; 31 [68]	-0.0295987						19.3 [58]	148.5; 6.72 [58]	-0.0688242
Sphyrna tiburo	Shallow								19.15 [103]
Sphyrna zygaena	Shallow	63.5; 29.8 [68]	0.0114343						19.74 [58]	63.5; 5.59 [96]	-0.0637531
Squalus acanthias	Deep							500 [100]
Squaliolus aliae	Bioluminescent	0.061; 6.67 [this study]	-0.16285	2.77 [this study]	48.43 [this study]	2.43	209.47 [this study]	491.2 [this study]	26.65 [this study]	0.061; 2.52 [this study]	-0.016386
Squalus grahami	Deep	0.64; 25.7 [68]	0.261985
Squalus megalops	Deep	1.34; 24.1 [68]	0.183463
Squalus mitsukurinii	Deep			1.9 [71]	35.86 [71]	1.01	162.73 [71]		24.64 [71]	2.456; 7.2 [71]	0.212817
Squalus suckeyi	Deep							497.5 [101]
Squatina californica	Deep							488 [97]
Triaenodon obsesus	Shallow	9.86; 18.3 [68]	-0.0727798	1.6 [22]	30.5 [22]	0.66	173.35 [22]		20.95 [22]
Triakis semifasciata	Shallow							502 [98]
Trigonognathus kabeyai	Bioluminescent	0.096; 7.08 [this study]	-0.167997				139.28 [this study]		16.02 [this study]	0.096; 1.80 [this study]	-0.190337
*This corresponds to the residuals of the log-log regression of eye size (axial length) against total mass.
**This corresponds to the residuals of the log-log regression of spatial resolving power (SRP) against total mass.
Bold values correspond either to total mass calculated from total length using Fishbase regressions or to photoreceptor (PR) measurements determined from digital micrographs using the software Image J.
GC, ganglion cells, ROS, rod outer segment.
